# Supplementary material
Source: PubMed Central journal article supplement (PMC5549277)
Supplement: NIHMS872289-supplement-ab.pdf [file NIHMS872289-supplement-ab.pdf]

**Supplementary Information Figure 1:** Chemical synthesis scheme for [<sup>125</sup>I]KX1.

**Supplementary Information Figure 2:** Whole western blots and regions of interest generated around the protein of interest.

**Supplementary Information Figure 3:** Kinetic analysis association and dissociation curves. The following curves represent the rate at which the PARP radiotracer [<sup>125</sup>I]KX1 associates and dissociates from the PARP-1 enzyme in a live cell assay. Each curve of the kinetic association graph represents a different concentration at which the rate of association was measured. The rate increases proportionally with concentration.

**Supplementary Information Table 1:** Summary table for cell lines used in vitro to validate [<sup>125</sup>I]KX1 as a marker of PARP-1 expression.

**Supplementary Information Table 2:** Competitive inhibition ( $K_i$ ) Values are presented for each PARP inhibitor as measured in the different cell lines.

**Supplementary Information Table 3:** Experimental association and dissociation values of [<sup>125</sup>I]KX1 measured in different cancer cell lines and calculated dissociation constants ( $K_d$ ).

**Supplementary Information Table 4:** Dissociation constants ( $K_d$ ) calculated from saturation experiments and experimental measurements of PARP 1 binding sites defined as  $B_{max}$ . These values are used in **figure 6 C** correlating PARP1 expression measured by western or [ $^{125}$ I]KX1.

**Supplementary Information Table 5:** Effective concentrations for 50% growth inhibition are shown below. These values were used for correlating PARP inhibitor sensitivity and PARP 1 expression in **figure 4**.
